# Supplementary material
Source: publisher figshare collection journal article supplement (https://tandf.figshare.com/ndownloader/files/17856383)
Supplement: Supplementary file 1 [file 17856383]

**Available outcome measures for Emotional Well-Being.**

| **Acronym** | **Measurement Tool** | **Construct** | **Scale** |
| --- | --- | --- | --- |
| **ATD-PA** | Assistive Technology Device Predisposition Assessment | Quality of Life | Number of Items=63 (divided into two domains), domain one contains 53 items which are divided into four sections. 10 items in domain two are designed to be administered for each assistive technology device |
| **ADAPSS** | The Appraisals of Disability: Primary and Secondary Scale | Body Function – Subcategory: General Functions. | - Number of Items=33; The scale consists of 6 subscales:   1) Fearful Despondency  2) Overwhelming Disbelief  3) Determined Resolve  4) Growth and Resilience  5) Negative Perceptions of Disability  6) Personal Agency   - Self-administered questionnaire. Participants are asked to rate their agreement /disagreement with the statements on a Likert Scale. - High scores on the Fearful Despondency, Overwhelming Disbelief, and Negative Perceptions of Disability subscales represent greater agreement with the appraisals; respondents with higher scores on these subscales are more likely to appraise their injury in terms of loss and threat and to perceive their injury as unmanageable. - Low scores on the Determined Resolve, Growth and Resilience, and Personal Agency subscales represent greater agreement with the appraisals (though the range of scores is not provided). Respondents with lower scores on these subscales were more likely to appraise their injury in terms of loss and threat and to perceive their injury as unmanageable. - Good predictors of emotional adjustment. - SCI-specific appraisal scale |
| **BDI** | Beck Depression Inventory | Depression | Number of Items=21, each item scored on a 4-point rating scale from 0 to 3; Higher scores indicate more severe symptoms over the last week |
| **BSI** | Brief Symptom Inventory | Depression | Number of Items=53, each item scored on a 5-point scale from 0 (not at all) to 4 (extremely over the last week). Validated for use in individuals with SCI.  <https://www.scireproject.com/outcome-measures-new/brief-symptom-inventory-bsi> |
| **CD-RISC 10** | Connor – Davidson Resilience Scale 10 | Resilience | Number of Items=10, each item scored on a 5-point Likert scale ranging from 0 (not true at all) to 4 (true nearly all of the time), and the sum of 10 was used to determine participants’ total score, with higher score indicating greater resilience |
| **CES-D** | Center for Epidemiologic Studies Depression | Depression | Number of Items=20, each item scored on a 4-point scale from 0 (rarely or none of the time) to 3 (most or all of the time) |
| **DASS - 21** | Depression, Anxiety, Stress Scales | Depression, Anxiety, & Stress | Number of Items=21, each item is scored on a 4-point scale from 0 (Did not apply to me at all) to 3 (Applied to me very much or most of the time), Sum the score of each item to get a total score |
| **GDS** | Geriatric Depression Scale | Depression | Number of Items= 30 Yes/No items, one point is assigned to each answer and the cumulative score is rated on a scoring grid |
| **GAD-7** | General Anxiety Disorder-7 | Anxiety | Number of Items = 7, each item scored on a 4-point scale from 0 (not at all) to 3 (Nearly every day) |
| **HADS** | Hospital Anxiety and Depression Scale | Depression & Anxiety | Number of Items=14, each item scored on a 4-point scale from 0 (not at all) to 3 (very often indeed over the last week) |
| **HDS** | Hamilton Depression Scale | Depression | Number of Items= 17 ( original), other versions were developed to include up to 29 items (HRSD-29) |
| **IPA** | Impact on Participation and Autonomy | Autonomy | Number of Items= 32, (Autonomy indoors =7 items, Family role= 7 items, Autonomy outdoors= 5 items, Social life and relationship= 7 items, Work and education= 6 items) on a 5 scale from very good to very poor (very good, good, fair, poor, very poor) |
| **LSQ** | Life Satisfaction Questionnaire | Quality of Life | Number of Items= 9, one question about global life satisfaction (life as a whole) and eight questions about domain-specific life satisfaction (self-care ability, leisure situation, vocational situation, financial situation, sexual life, partnership relation, family life, contacts with friends and acquaintances) on a six-point scale (1 = very dissatisfied up to 6 = very satisfied) |
| **PC-PTSD** | Primary Care post-traumatic disorder screen | PTSD | Number of Items= 4, each item scored on a 2-point scale of yes/no and should be considered "positive" if a patient answers "yes" to any three items |
| **PHQ-9** | Patient Health Questionnaire | Depression | Number of Items=9, each item scored on a 4-point rating scale from 0 (not at all) to 3 (nearly every day over the last 2). A cut-off score of equal or greater than 10 indicates the presence of current depression symptomology. Studies in the SCI inpatient population suggest utilizing a cut-off of equal or greater than 11.  <http://www.cqaimh.org/pdf/tool_phq9.pdf> |
| **PTSDI** | Post-Traumatic Stress Disorder Inventory | PTSD | The questionnaire consist of 17 statements corresponding to the PTSD symptoms and subjects are asked to indicate for each statements whether or not they suffered the symptoms in two given periods of ‘during the last month” & “in the past” |
| **MAST** | Michigan Alcohol Screening Test Interview | Alcoholism Screening | Number of Items= 25 Yes/No, a total score of 0 to 53 is possible, and a score of 5 or higher is suggestive of alcoholism |
| **MINI** | Mini-International Neuropsychiatric Interview | Psychiatric Disorders | The Mini-international neuropsychiatric interview is a short structured clinical interview which enables researchers to make diagnoses of psychiatric disorders according to [DSM-IV](https://en.wikipedia.org/wiki/DSM-IV) or [ICD-10](https://en.wikipedia.org/wiki/ICD-10) |
| **SCI-QL-23** | Spinal Cord Injury Quality of Life Questionnaire | Quality of Life | Number of Items= 25, Two factors were used; problems regarding injury (PROB; six items), which was derived from a list of 10 questions describing perceptions of physical dependency (being unable to walk or move freely, needing help with many things, being unable to do things when wanted), of complications and of social stigma. Physical/social functioning (FUNC; 10 items) covers limitations in mobility, body care and movement and social interaction. High scores on the subscales of this measure represent limitations in SCI-related QOL |
| **SCID** | Structured Clinical Interview for DSM Disorders | Psychiatric Disorders | Semi-structured interview consists of a series of open-ended questions that encourage subjects to describe their symptoms in their own words. The interviewer must make a clinical judgment as to whether diagnostic criterion has been met |
| **SCL CSQ** | Spinal Cord Lesion-related Coping  Strategies Questionnaire | Coping | Number of Items=12 [Acceptance (four  items), Fighting spirit (five items), and Social reliance (three items)] on a four-step Likert scale (strongly disagree, disagree, agree, strongly agree) and responses are coded from 1 to 4. Scores represent the mean of the ratings, giving a theoretical range of 1–4. Higher scores indicate greater use of the strategy in question. |
| **SDS** | Zung Self-Rating Depression Scale | Depression | Number of Items=20, each item scored on a 4-point scale from 1 (little or none of the time) to 4 (most or all of the time) |
| **STAI** | State Trait Anxiety Inventory | Anxiety (distinguish anxiety from depressive syndrome) | Number of Items=40, each item scored on a 4-point scale from 1 (almost Never) to 4 (almost Always) |
| **SWLS** | Satisfaction with Life Scale | life satisfaction | Number of Items=5, each item scored on a 7-point Likert scale from 1 (strongly disagree) to 7 (strongly agree) |
